# Supplementary material
Source: PubMed Central journal article supplement (PMC9250010)
Supplement: NIHMS1808899-supplement-Supplemental_Information.pdf [file NIHMS1808899-supplement-Supplemental_Information.pdf]

## Contents

### Figures

Supplementary Figure 1 | Flow cytometry gating strategy.

Supplementary Figure 2 | IPA and GSEA of electromechanically matured cardiac tissues.

Supplementary Figure 3 | Cardiac Gene Set Enrichment for Gene Ontology Biological Processes in matured human cardiac tissues.

Supplementary Figure 4 | Cardiac pathway enrichment and drug responses within matured human cardiac tissues.

Supplementary Figure 5 | Proteomic analysis maintains biological fidelity of tissues when cultured in *Multi-organ* tissue chip.

Supplementary Figure 6 | Schematic details models developed for simulation of studies without an endothelial barrier, endothelial barrier details, and mass balance for drugs over time.

Supplementary Figure 7 | FITC-dextran (3 kDa) diffusion and binding to the tissue chip.

Supplementary Figure 8 | Doxorubicin metabolism within the engineered liver tissue.

Supplementary Figure 9 | Experimental data and PK model of doxorubicin treatment in the *Mixed* tissue chip.

Supplementary Figure 10 | *In vitro* biomarkers of doxorubicin cardiotoxicity in multi-tissue chips.

Supplementary Figure 11 | *In vitro* biomarkers of doxorubicin cardiomyopathy in isolated tissue chips.

Supplementary Figure 12 | *In vitro* biomarkers of doxorubicin cardiomyopathy in perfusate of multi-tissue chips.

### Tables

Supplementary Table 1 | Tissue specifications.

Supplementary Table 2 | Media compositions for each tissue type.

Supplementary Table 3 | Modeling parameters.

Supplementary Table 4 | Terms used in the computational model and their meaning.

### Videos

Supplementary Video 1 | Assembly of the tissue chip.

### References

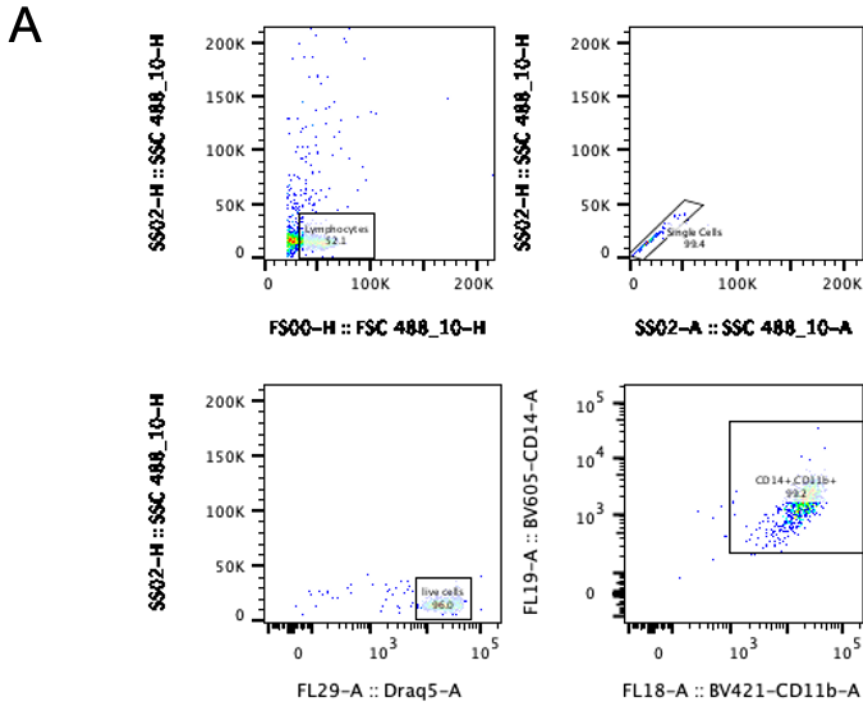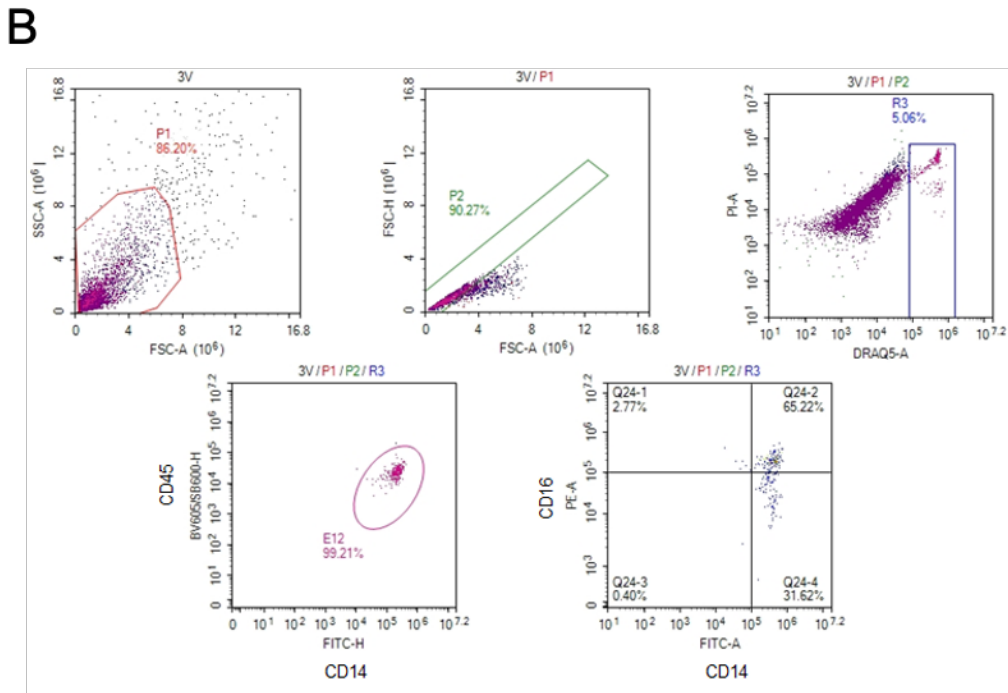

**Supplementary Figure 1 | Flow cytometry gating strategy. a**, Example gating strategy for magnetic-sorted CD14<sup>+</sup> monocytes from human peripheral blood, acquired on Bio-Rad ZE5 Cell Analyzer. **b**, Example gating strategy for circulating cells isolated from the *Multi-organ* tissue chips, acquired on Agilent NovoCyte Quanteon.

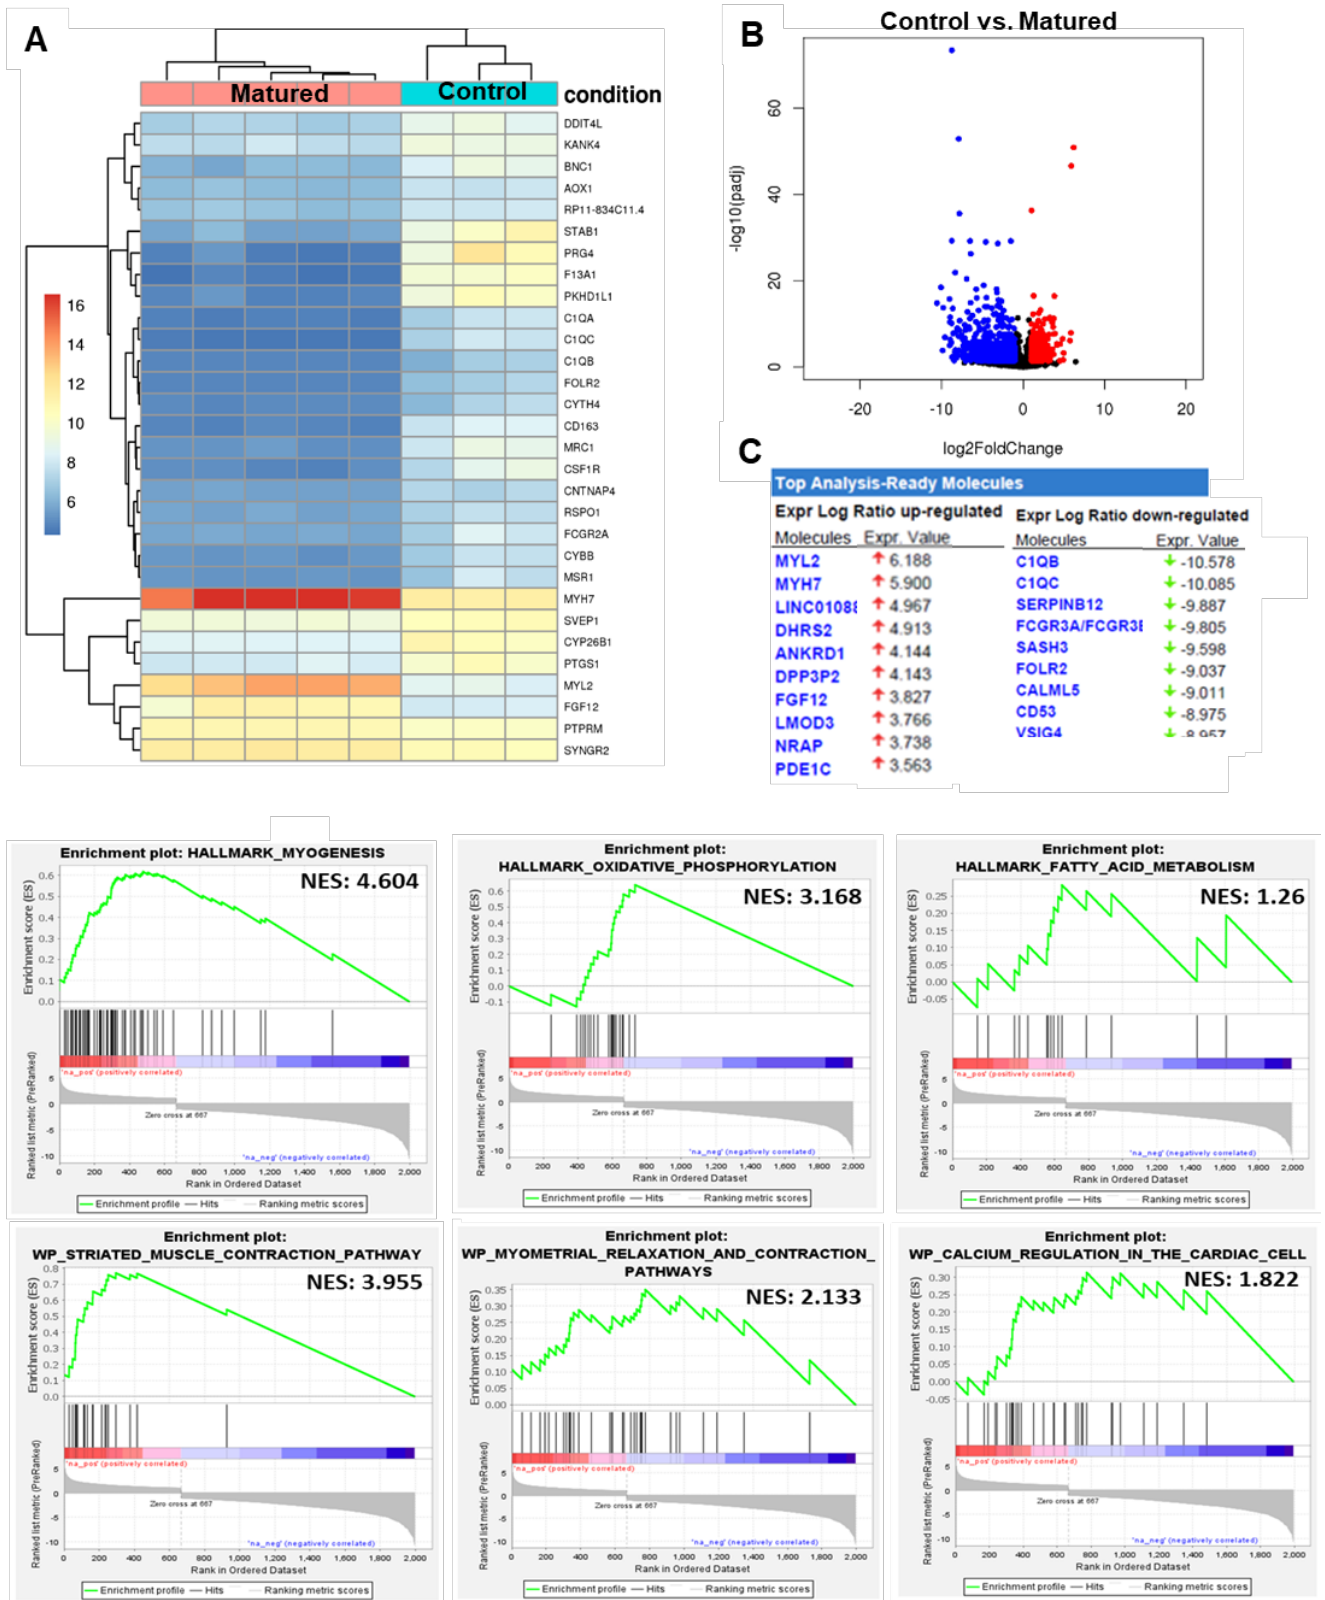

**Supplementary Figure 2 | IPA and GSEA of electromechanically matured cardiac tissues. a,** RNA sequencing heatmap of control heart tissues versus electromechanically matured Dataset tissues. **b,** Volcano plot of control versus matured cardiac tissue gene expression. **c,** Top Analysis Ready Molecules as determined by IPA Analysis. **d-e,** Gene Set Enrichment of Hallmark Pathways (**d**) and WikiPathways (**e**) for matured versus control heart tissues.

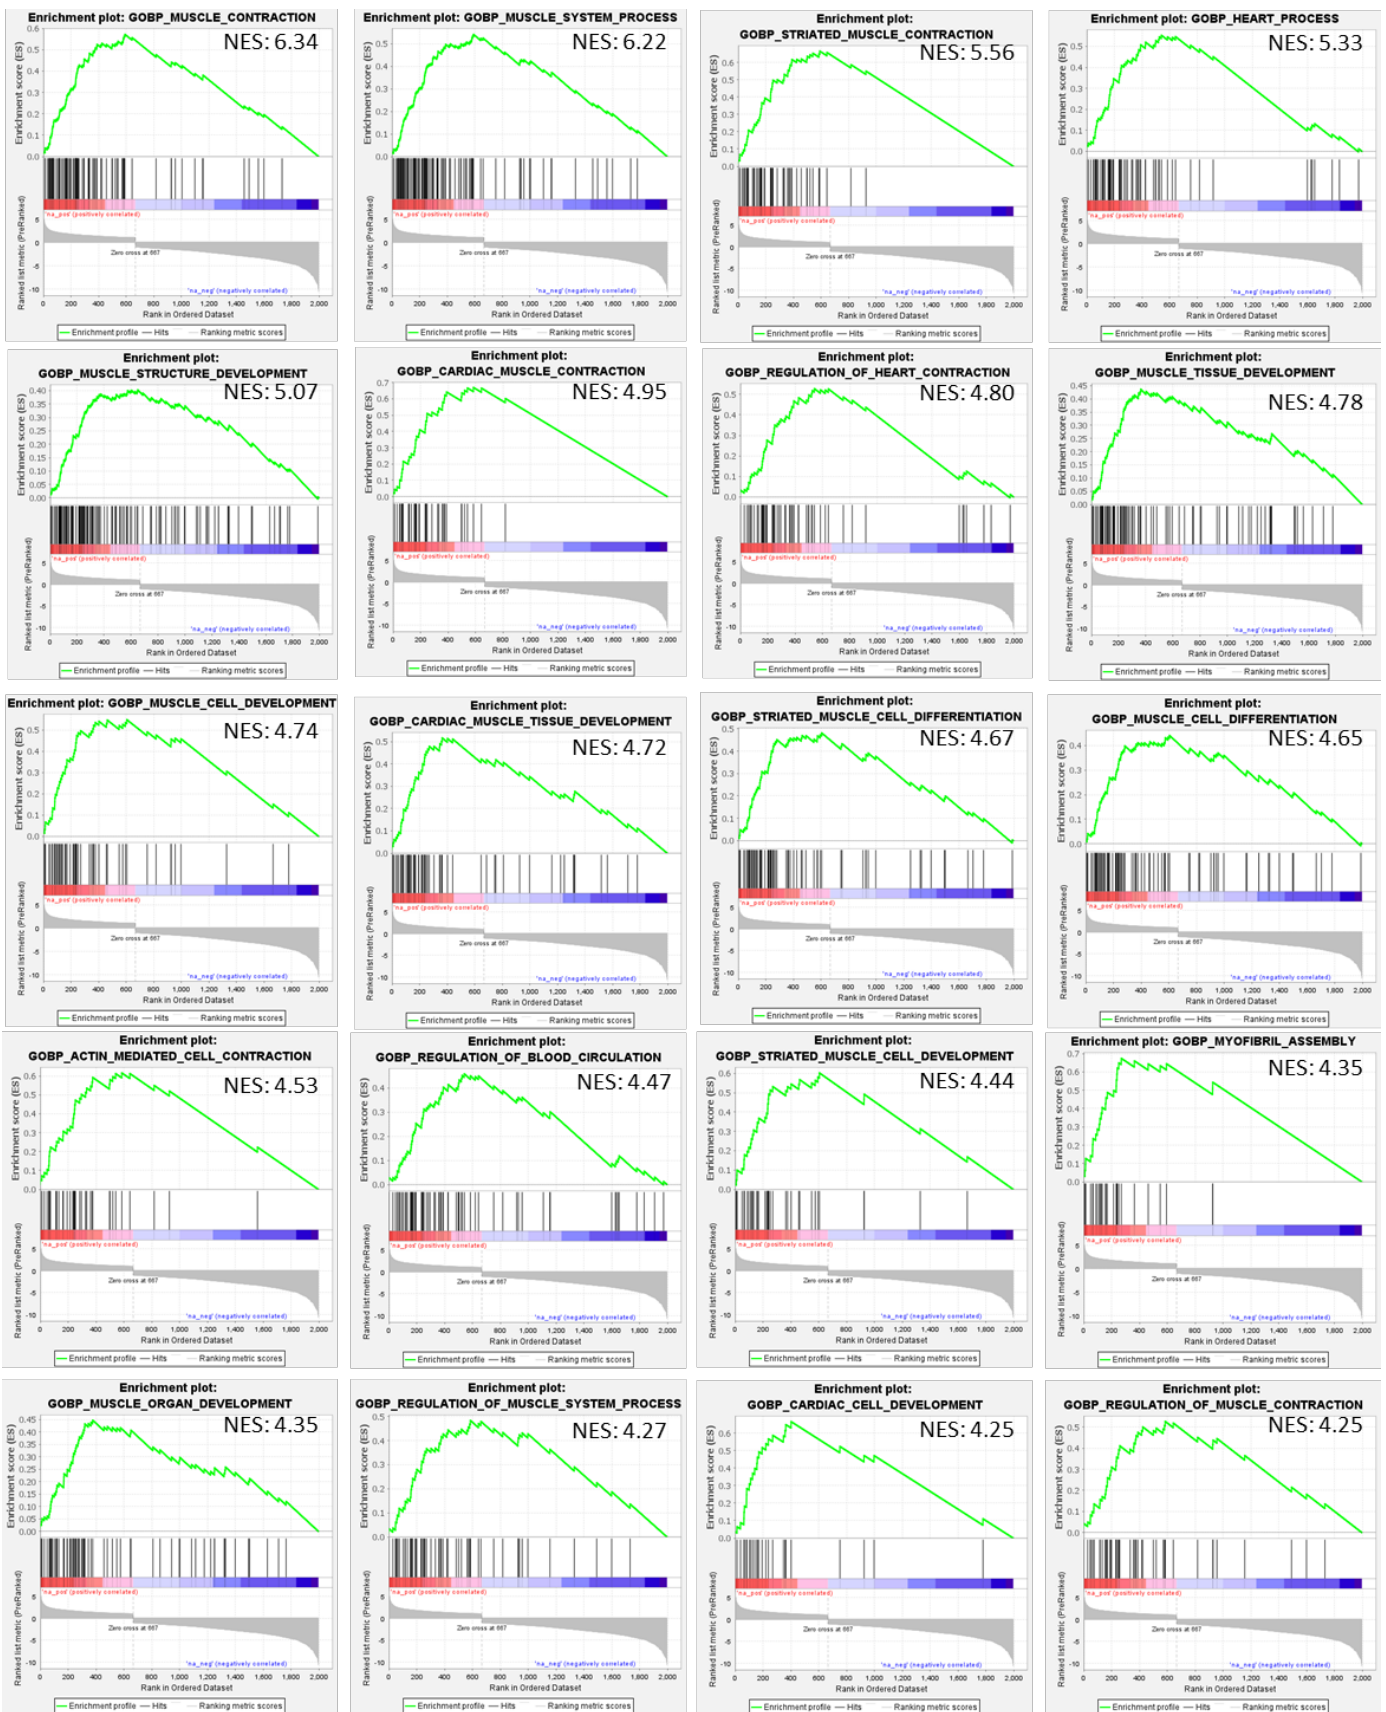

**Supplementary Figure 3 | Cardiac Gene Set Enrichment for Gene Ontology Biological Processes in matured human cardiac tissues.** Gene Set Enrichment Plots of the enriched Gene Ontology Biological Processes for matured versus control heart tissues.

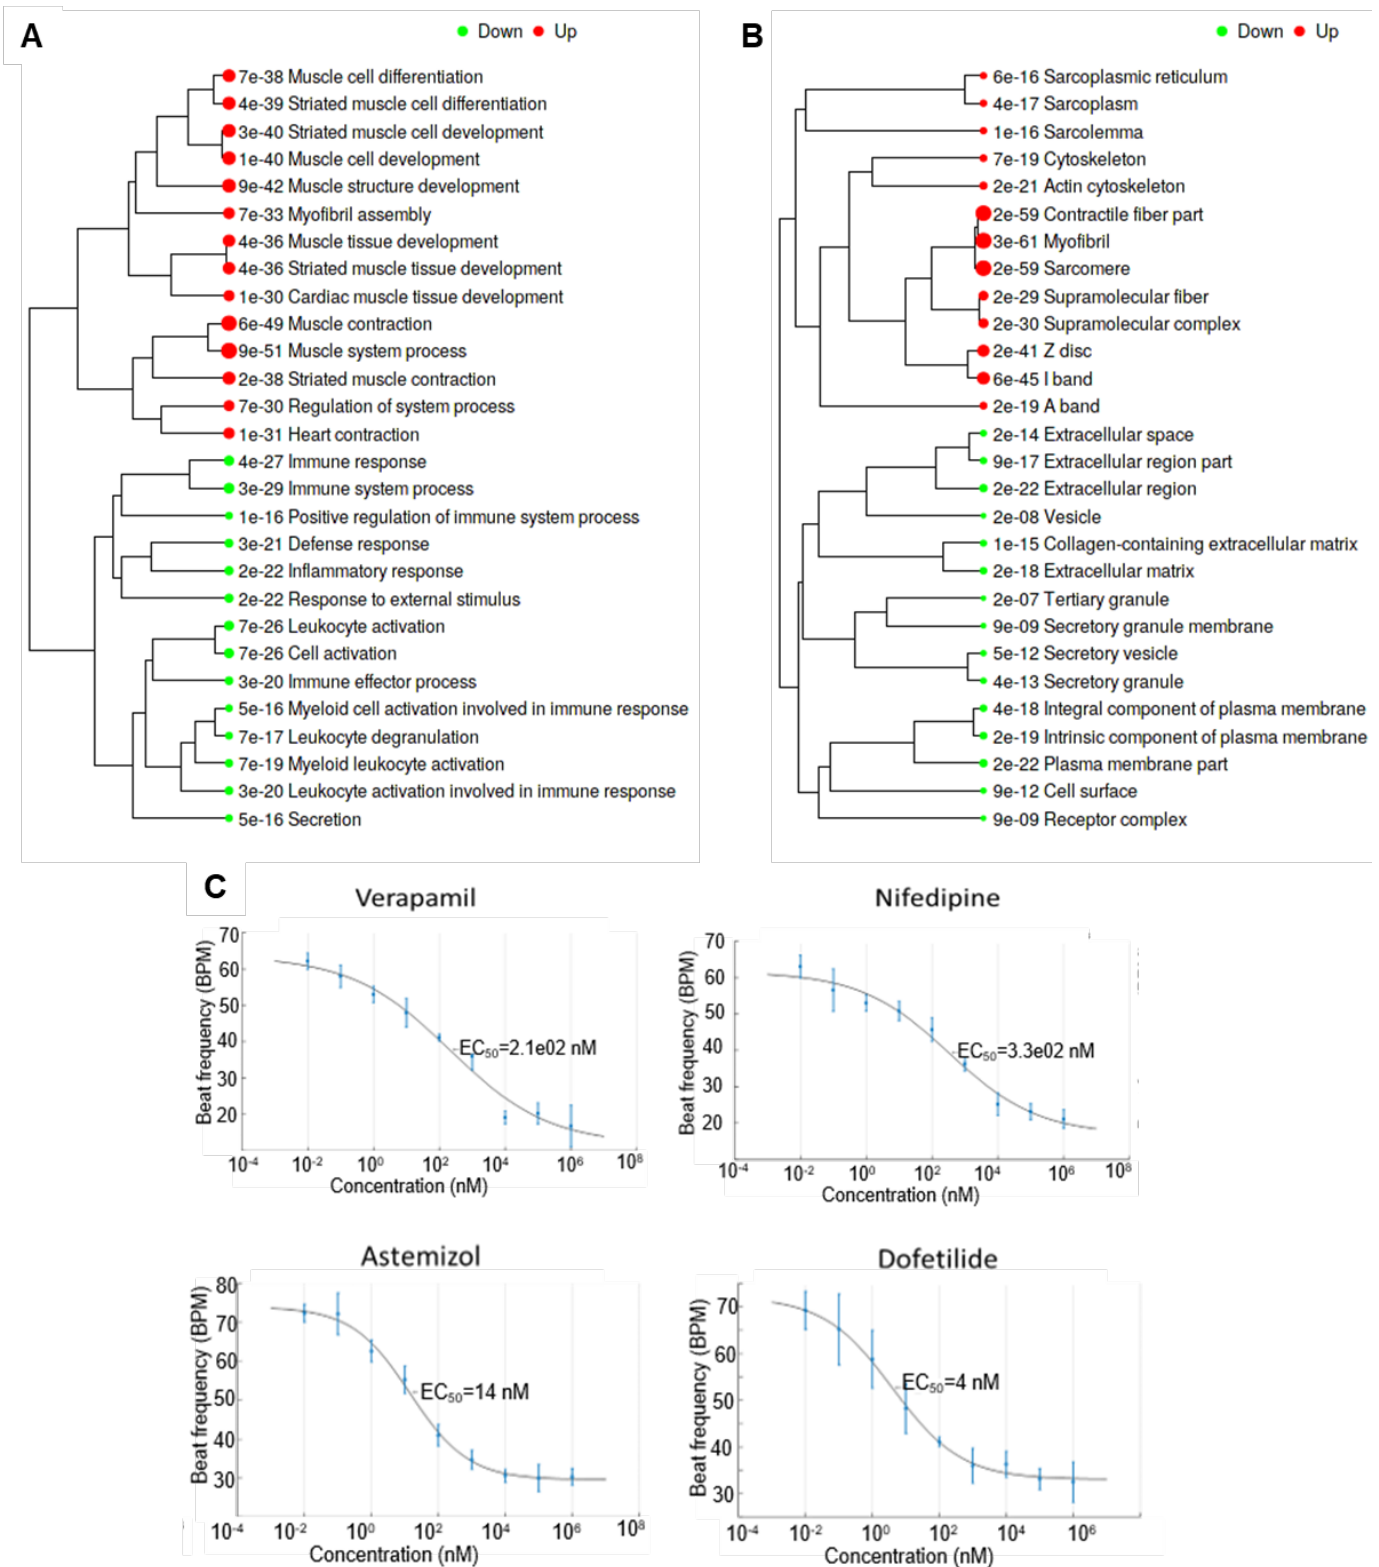

**Supplementary Figure 4 | Cardiac pathway enrichment and drug responses within matured human cardiac tissues.** a-b, Gene Ontology of Biological Processes (a) and Cellular components (b) for electromechanically matured versus control heart tissues, using RNA sequencing analysis between control heart tissues versus electromechanically matured tissues. c, Mature tissues were further validated by measuring dose-dependent responses (n=3-6, shown as mean with 95% confidence interval) to calcium signaling drugs, using calcium channel blockers.

a GO analysis of shared highly expressed proteins

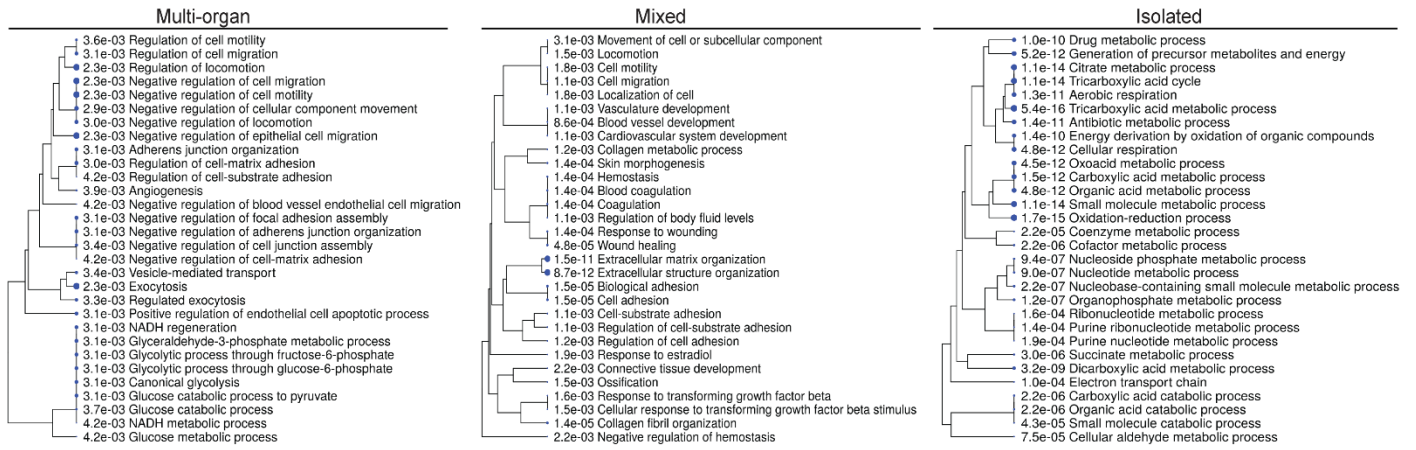

**Supplementary Figure 5 | Proteomic analysis maintains biological fidelity of tissues when cultured in *Multi-organ* tissue chip. a, Comparison of shared highly expressed proteins (present within all engineered organs within each experimental group) using Gene Ontology (GO) analysis identifies shared gene pathways that are highly expressed amongst all the different engineered organs when cultured in each linked tissue chip configuration.**

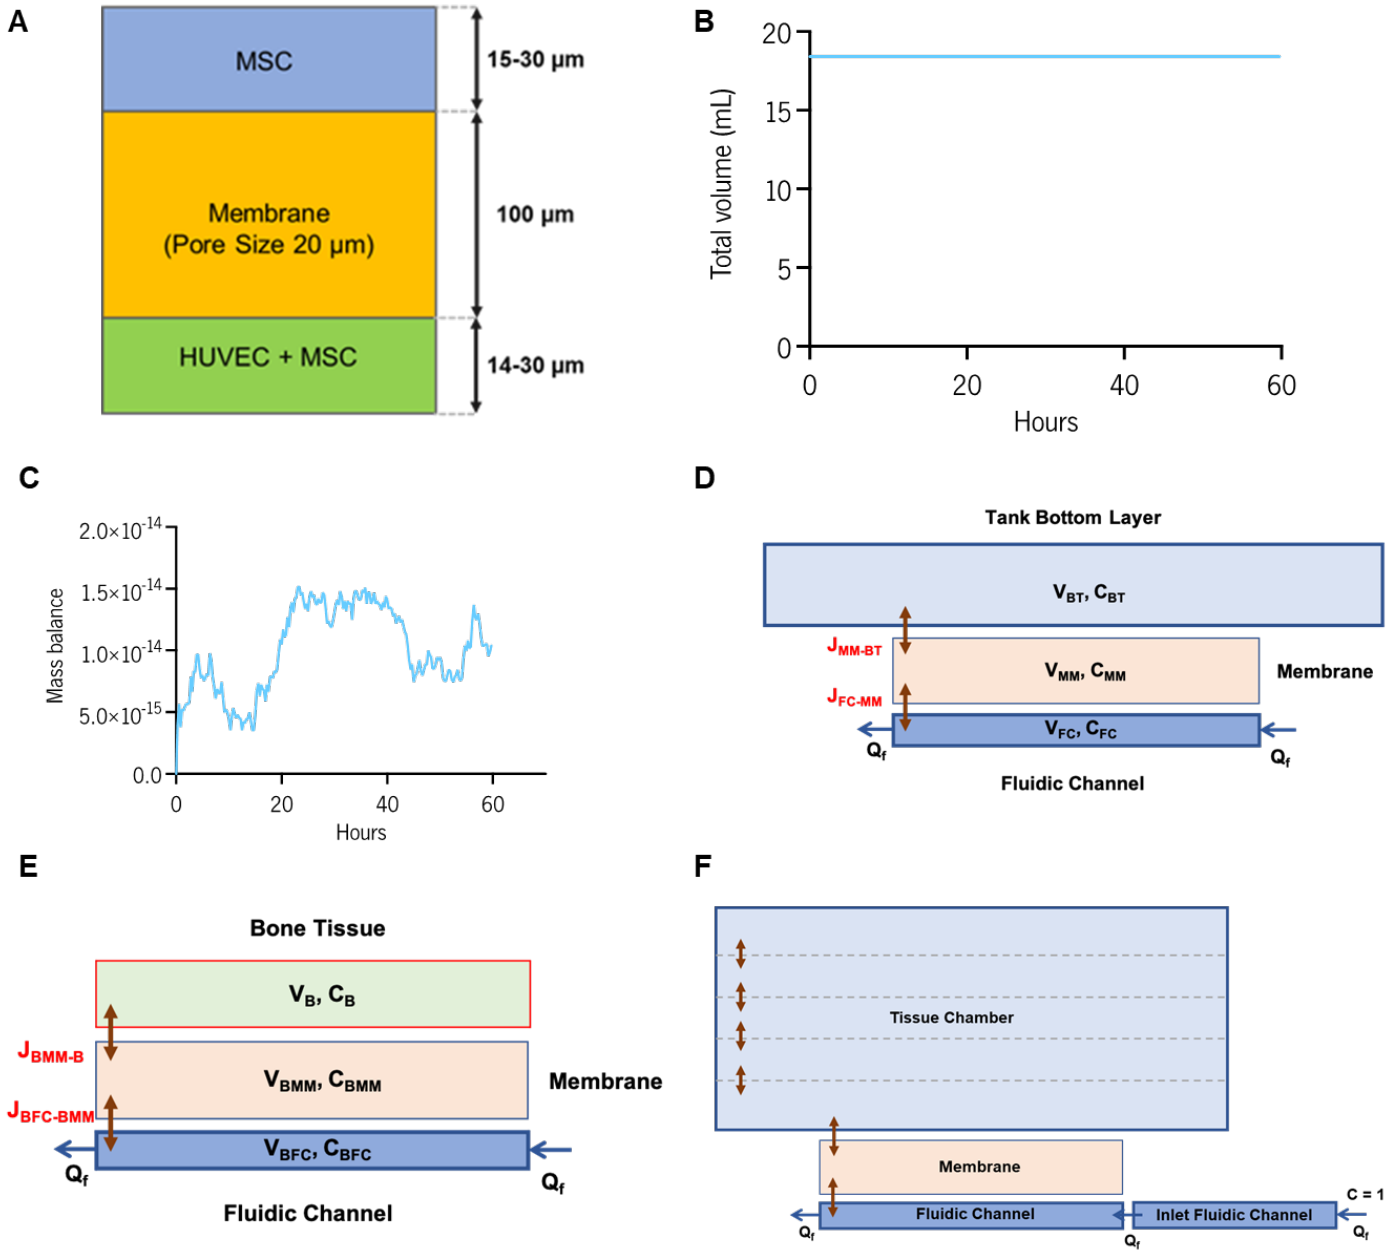

**Supplementary Figure 6 | Schematic details models developed for simulation of studies without an endothelial barrier, endothelial barrier details, and mass balance for drugs over time. a,** Detailed schematic of the endothelial barrier. **b-c,** Volume (**b**) and mass (**c**) conservation for doxorubicin from the reservoir over time. **d,** Bottom layer of the tissue chambers of liver, heart, and skin. **e,** Bottom layer of the bone tissue chamber. **f,** Five discretization test case model for doxorubicin.

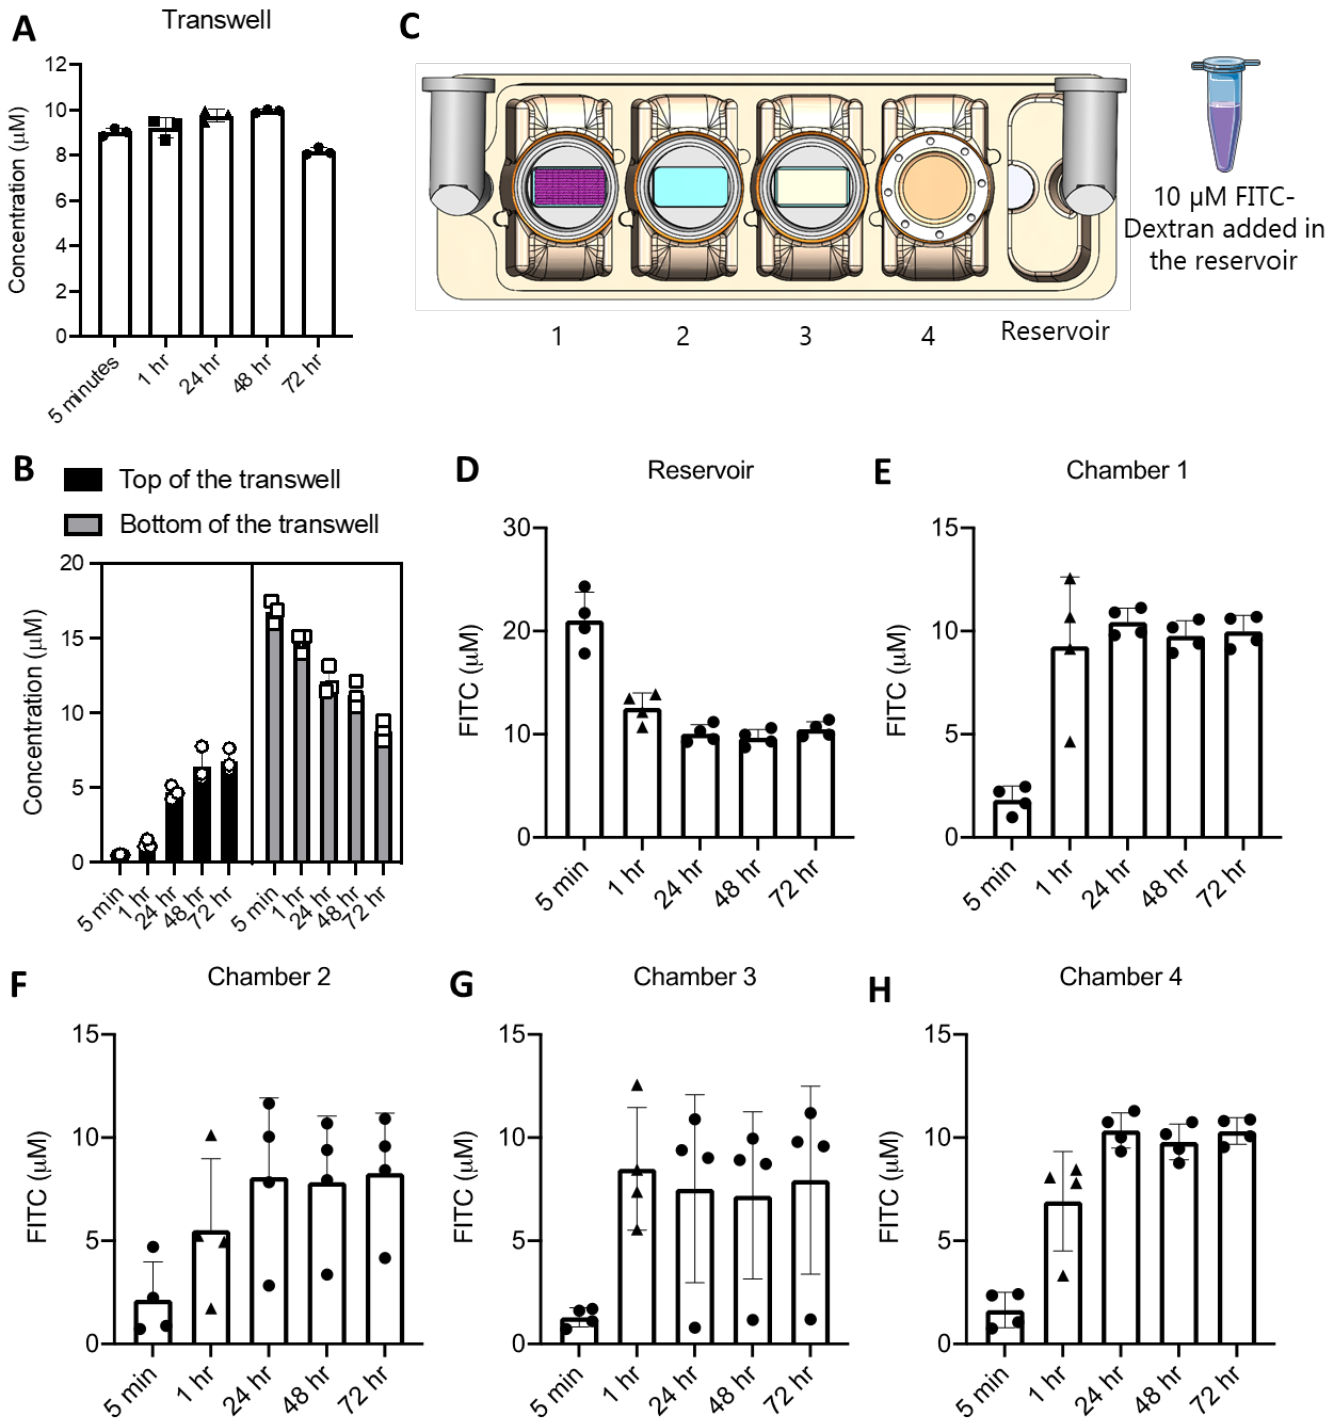

**Supplementary Figure 7 | FITC-dextran (3 kDa) diffusion and binding to the tissue chip. a,** Absorption (n=3 biological replicates). **b,** Diffusion through transwell (n=3 biological replicates). **c,** Schematic of the experimental design to evaluate FITC-Dextran diffusion in the chip over time. **d-h,** Experimental results of FITC-Dextran diffusion in the tissue chip for the reservoir (**d**), chamber 1 (**e**), chamber 2 (**f**), chamber 3 (**g**), and chamber 4 (**h**) over time (n=4 biological replicates). Data are mean ± SD.





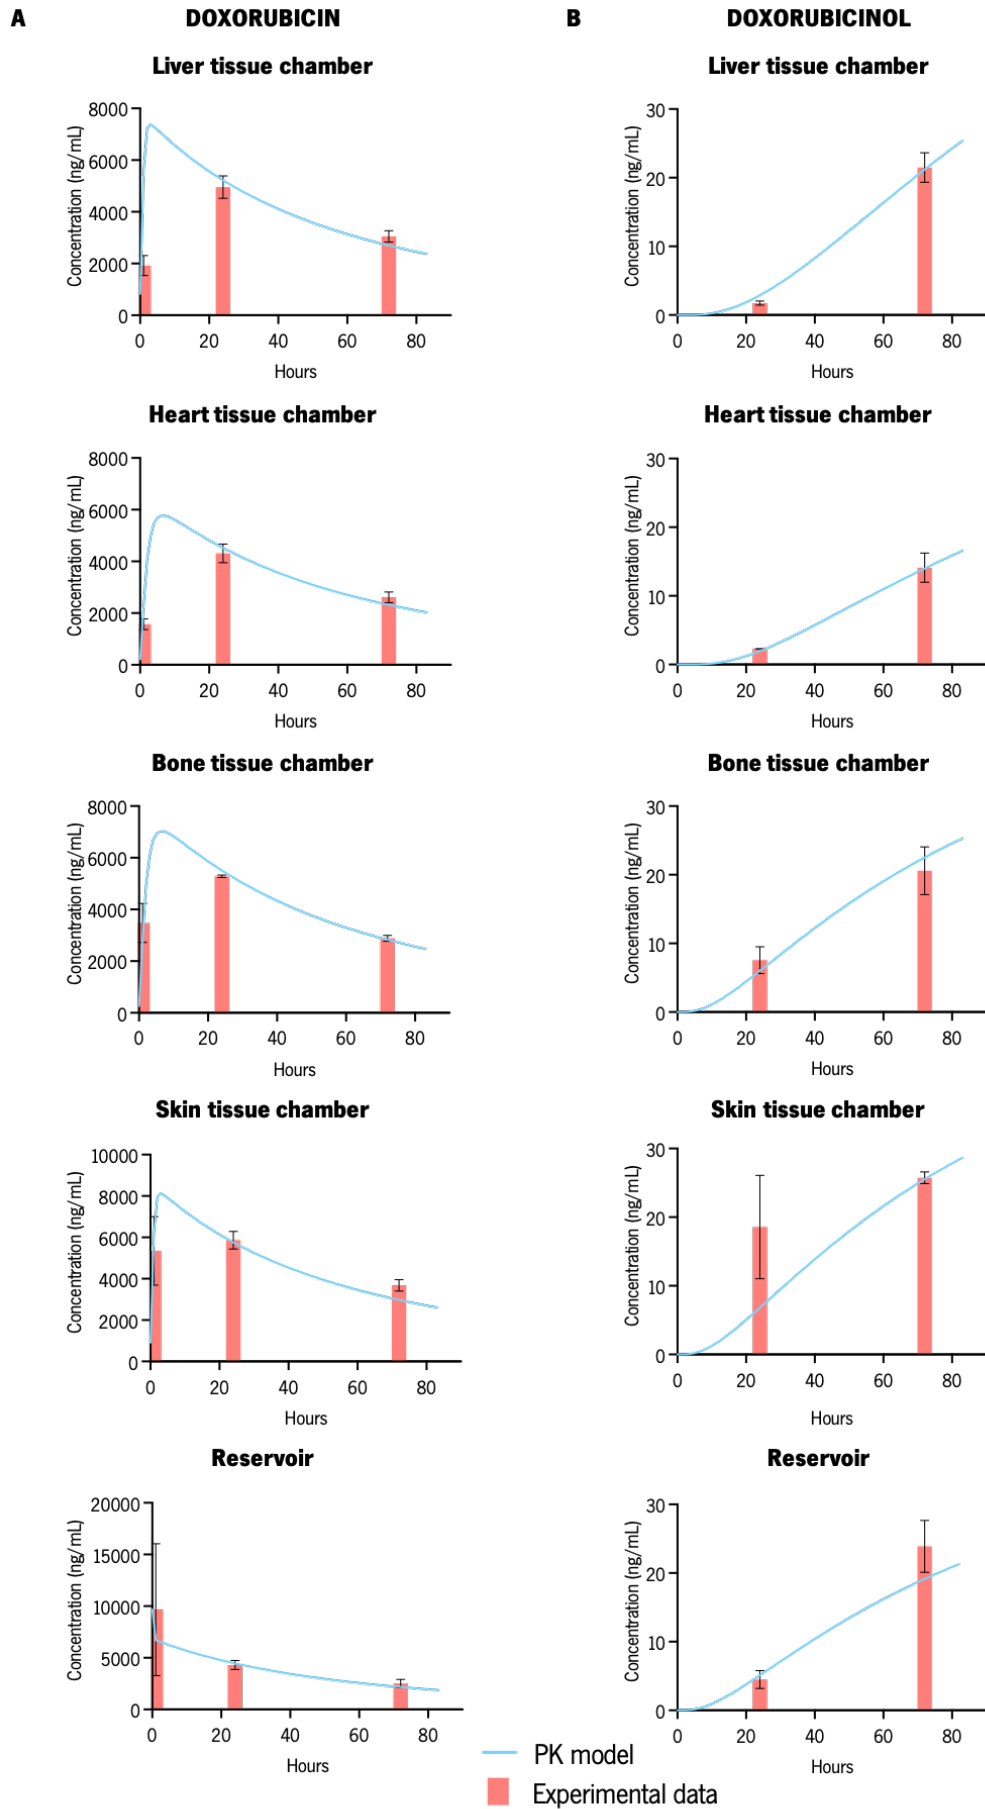

**Supplementary Figure 9 | Experimental data and PK model of doxorubicin treatment in the *Mixed* tissue chip. a-b, Doxorubicin (a) and doxorubicinol (b) levels, measured over time by UPLC-MSMS within all tissue chambers and in the reservoir (red bar), compared with prediction of the computational PK model (blue line). Data are mean  $\pm$  SD.**

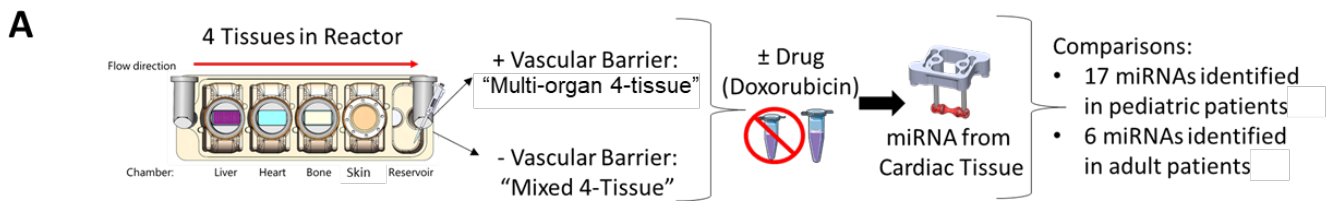

**miRNA Biomarkers of Doxorubicin Induced Cardiomyopathy – Pediatric Clinical Trial<sup>17</sup> Comparison**

**B**

| Multi-organ 4-tissue Cardiac Tissue miRNA (Doxorubicin vs Control) |           |       |        |          |
|--------------------------------------------------------------------|-----------|-------|--------|----------|
| miRNA                                                              | GSEA plot | NES   | FC     | pval     |
| hsa-miR-143-3p                                                     |           | -0.89 | -1.01* | 2.70e-03 |
| hsa-miR-199a-5p                                                    |           | -2.66 | -3.13* | 4.10e-05 |
| hsa-miR-107-5p                                                     |           | -0.93 | -1.04* | 2.90e-03 |
| hsa-miR-320a                                                       |           | 1.12  | 1.43*  | 7.30e-03 |
| hsa-miR-103a-3p                                                    |           | -1.09 | -1.11* | 2.70e-03 |
| hsa-miR-145-5p                                                     |           | -1.19 | -1.22* | 3.30e-03 |
| hsa-miR-181a-5p                                                    |           | -1.19 | -1.22* | 3.90e-03 |
| hsa-miR-100-5p                                                     |           | -1.29 | -1.41* | 4.20e-03 |
| hsa-miR-499a-5p                                                    |           | -9.98 | -10.01 | 1.20e-08 |
| hsa-miR-146a-5p                                                    |           | -3.23 | -3.45* | 9.80e-06 |
| hsa-miR-210-3p                                                     |           | -2.09 | -2.11  | 9.10e-04 |
| hsa-miR-92a-3p                                                     |           | -1.76 | -1.8   | 1.80e-04 |
| hsa-miR-342-3p                                                     |           | -1.02 | -1.03* | 1.10e-03 |
| hsa-miR-142-3p                                                     |           | 1.52  | 1.61   | 3.10e-03 |
| hsa-miR-150-5p                                                     |           | 1.56  | 1.63   | 3.20e-03 |
| hsa-miR-29c-3p                                                     |           | -0.97 | -1.23  | 1.10e-03 |
| hsa-miR-486-5p                                                     |           | -2.38 | -2.45  | 1.60e-04 |

**C**

| Mixed 4-tissue Cardiac Tissue miRNA (Doxorubicin vs Control) |           |        |        |          |
|--------------------------------------------------------------|-----------|--------|--------|----------|
| miRNA                                                        | GSEA plot | NES    | FC     | pval     |
| hsa-miR-143-3p                                               |           | 1.89   | 1.98   | 1.80e-03 |
| hsa-miR-199a-5p                                              |           | -14.26 | -14.03 | 4.10e-17 |
| hsa-miR-107-5p                                               |           | 1.21   | 1.34   | 9.20e-03 |
| hsa-miR-320a                                                 |           | -2.01  | -2.07  | 1.90e-03 |
| hsa-miR-103a-3p                                              |           | 1.19   | 1.21   | 3.70e-03 |
| hsa-miR-145-5p                                               |           | 3.23   | 3.45   | 1.30e-05 |
| hsa-miR-181a-5p                                              |           | 0.59   | 0.72   | 1.10e-02 |
| hsa-miR-100-5p                                               |           | -2.13  | -2.41* | 1.20e-04 |
| hsa-miR-499a-5p                                              |           | 1.78   | 1.91*  | 2.30e-03 |
| hsa-miR-146a-5p                                              |           | -1.23  | -1.45* | 9.80e-04 |
| hsa-miR-210-3p                                               |           | -3.19  | -3.21  | 1.1e-05  |
| hsa-miR-92a-3p                                               |           | -1.56  | -1.6   | 7.80e-03 |
| hsa-miR-342-3p                                               |           | 1.12   | 1.13   | 1.10e-03 |
| hsa-miR-142-3p                                               |           | -1.22  | -1.25* | 3.10e-03 |
| hsa-miR-150-5p                                               |           | 1.26   | 1.33   | 5.20e-03 |
| hsa-miR-29c-3p                                               |           | 1.17   | 1.19*  | 2.10e-03 |
| hsa-miR-486-5p                                               |           | -1.38  | -1.45  | 6.50e-03 |

**miRNA Biomarkers of Doxorubicin Induced Cardiomyopathy – Adult Clinical Trial<sup>20</sup> Comparison**

**D**

| Multi-organ 4-tissue Cardiac Tissue miRNA (Doxorubicin vs Control) |           |       |        |          |
|--------------------------------------------------------------------|-----------|-------|--------|----------|
| miRNA                                                              | GSEA plot | NES   | FC     | pval     |
| hsa-miR-4638-3p                                                    |           | 1.22  | 1.44   | 2.70e-03 |
| hsa-miR-5096                                                       |           | 1.66  | 3.23   | 4.30e-05 |
| hsa-miR-4763-5p                                                    |           | -1.73 | -1.84  | 3.30e-03 |
| hsa-miR-1273g-3p                                                   |           | -1.28 | -1.33  | 2.80e-03 |
| hsa-miR-4726-5p                                                    |           | 1.39  | 1.41   | 2.80e-03 |
| hsa-miR-1273a                                                      |           | -43.2 | -45.23 | 3.30e-19 |

**E**

| Mixed 4-tissue Cardiac Tissue miRNA (Doxorubicin vs Control) |           |       |       |          |
|--------------------------------------------------------------|-----------|-------|-------|----------|
| miRNA                                                        | GSEA plot | NES   | FC    | pval     |
| hsa-miR-4638-3p                                              |           | -1.29 | -1.38 | 2.80e-03 |
| hsa-miR-5096                                                 |           | 1.26  | 1.33  | 2.90e-03 |
| hsa-miR-4763-5p                                              |           | 1.21  | 1.34  | 2.20e-03 |
| hsa-miR-1273g-3p                                             |           | 1.92  | 1.93  | 4.90e-03 |
| hsa-miR-4726-5p                                              |           | -1.29 | -1.31 | 2.70e-03 |
| hsa-miR-1273a                                                |           | 1.23  | 1.45  | 2.30e-03 |

**Supplementary Figure 10 | *In vitro* biomarkers of doxorubicin cardiotoxicity in multi-tissue chips.** **a**, Schematic detailing workflow characterizing miRNA expression between 4-tissue *Multi-organ* and *Mixed* tissue chips after doxorubicin treatment. **b-c**, Gene set enrichment analysis (GSEA) of miRNAs from four tissue *Multi-organ* (**b**) and *Mixed* (**c**) tissue chips after doxorubicin treatment as benchmarked against clinically identified biomarkers of doxorubicin toxicity in a pediatric study (Oatmen et al., 2018). **d-e**, Gene set enrichment analysis (GSEA) of miRNAs from four tissue *Multi-organ* (**d**) and *Mixed* (**e**) tissue chips after doxorubicin treatment as benchmarked against clinically identified biomarkers of doxorubicin toxicity in an adult study (Yadi et al., 2020). (\*Consistent with clinical finding; Color codes – Blue (Negative Fold-Change), Red (Positive Fold-Change))

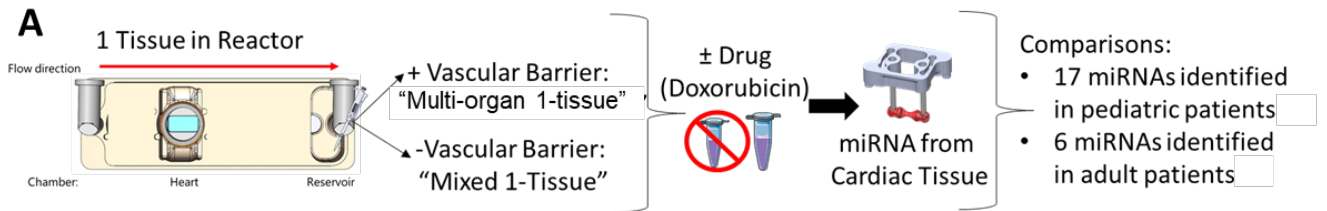

**miRNA Biomarkers of Doxorubicin Induced Cardiomyopathy – Pediatric Clinical Trial<sup>17</sup> Comparison**

**B**

Multi-organ 1-tissue Cardiac Tissue miRNA (Doxorubicin vs Control)

| miRNA           | GSEA plot | NES   | FC     | pval     |
|-----------------|-----------|-------|--------|----------|
| hsa-miR-143-3p  |           | -1.09 | -1.18* | 8.20e-03 |
| hsa-miR-199a-5p |           | -1.16 | -1.23* | 9.10e-03 |
| hsa-miR-107-5p  |           | -1.2  | -1.33* | 9.50e-03 |
| hsa-miR-320a    |           | -1.15 | -1.17  | 7.30e-03 |
| hsa-miR-103a-3p |           | -1.12 | -1.15* | 6.70e-03 |
| hsa-miR-145-5p  |           | -1.23 | -1.29* | 1.1e-03  |
| hsa-miR-181a-5p |           | -1.59 | -1.72* | 1.30e-03 |
| hsa-miR-100-5p  |           | -1.33 | -1.41* | 1.10e-03 |
| hsa-miR-499a-5p |           | 1.58  | 1.71*  | 1.30e-03 |
| hsa-miR-146a-5p |           | 1.43  | 1.45   | 1.20e-03 |
| hsa-miR-210-3p  |           | -1.19 | -1.21  | 9.80e-03 |
| hsa-miR-92a-3p  |           | -1.2  | -1.23  | 9.90e-03 |
| hsa-miR-342-3p  |           | -1.22 | -1.24* | 1.10e-03 |
| hsa-miR-142-3p  |           | -1.32 | -1.36* | 1.10e-03 |
| hsa-miR-150-5p  |           | -1.56 | -1.63* | 1.30e-03 |
| hsa-miR-29c-3p  |           | 1.27  | 1.29*  | 9.90e-02 |
| hsa-miR-486-5p  |           | -1.78 | -1.95  | 1.60e-03 |

0 750 1500 2250 3000

**C**

Mixed 1-tissue Cardiac Tissue miRNA (Doxorubicin vs Control)

| miRNA           | GSEA plot | NES   | FC     | pval     |
|-----------------|-----------|-------|--------|----------|
| hsa-miR-143-3p  |           | -2.82 | -2.91* | 1.90e-04 |
| hsa-miR-199a-5p |           | 18.02 | 19.21  | 1.20e-18 |
| hsa-miR-107-5p  |           | 1.02  | 1.12   | 6.30e-03 |
| hsa-miR-320a    |           | 1.12  | 1.22*  | 9.30e-03 |
| hsa-miR-103a-3p |           | 1.24  | 1.29   | 1.10e-02 |
| hsa-miR-145-5p  |           | -4.12 | -4.23* | 2.30e-06 |
| hsa-miR-181a-5p |           | -1.24 | -1.39* | 1.30e-03 |
| hsa-miR-100-5p  |           | 1.21  | 1.25   | 1.10e-02 |
| hsa-miR-499a-5p |           | 1.01  | 1.05*  | 9.50e-03 |
| hsa-miR-146a-5p |           | 1.31  | 1.35   | 1.10e-03 |
| hsa-miR-210-3p  |           | 1.41  | 1.46*  | 1.30e-03 |
| hsa-miR-92a-3p  |           | 1.11  | 1.15*  | 1.10e-02 |
| hsa-miR-342-3p  |           | 1.21  | 1.25   | 1.10e-02 |
| hsa-miR-142-3p  |           | 1.18  | 1.19   | 1.10e-02 |
| hsa-miR-150-5p  |           | -1.16 | -1.17* | 1.10e-02 |
| hsa-miR-29c-3p  |           | 1.19  | 1.21*  | 1.10e-02 |
| hsa-miR-486-5p  |           | -1.26 | -1.27  | 1.10e-02 |

0 750 1500 2250 3000

**miRNA Biomarkers of Doxorubicin Induced Cardiomyopathy – Adult Clinical Trial<sup>20</sup> Comparison**

**D**

Multi-organ 1-tissue Cardiac Tissue miRNA (Doxorubicin vs Control)

| miRNA            | GSEA plot | NES   | FC    | pval     |
|------------------|-----------|-------|-------|----------|
| hsa-miR-4638-3p  |           | -1.29 | -1.38 | 2.20e-03 |
| hsa-miR-5096     |           | -1.26 | -1.33 | 2.10e-03 |
| hsa-miR-4763-5p  |           | -1.3  | -1.33 | 2.50e-03 |
| hsa-miR-1273g-3p |           | -1.35 | -1.37 | 2.30e-03 |
| hsa-miR-4726-5p  |           | -1.32 | -1.35 | 2.70e-03 |
| hsa-miR-1273a    |           | -1.33 | -1.39 | 1.10e-03 |

0 750 1500 2250 3000

**E**

Mixed 1-tissue Cardiac Tissue miRNA (Doxorubicin vs Control)

| miRNA            | GSEA plot | NES   | FC    | pval     |
|------------------|-----------|-------|-------|----------|
| hsa-miR-4638-3p  |           | -1.82 | -1.91 | 2.90e-03 |
| hsa-miR-5096     |           | -1.02 | -1.21 | 1.20e-03 |
| hsa-miR-4763-5p  |           | 1.02  | 1.09  | 1.10e-03 |
| hsa-miR-1273g-3p |           | 1.12  | 1.19  | 1.90e-03 |
| hsa-miR-4726-5p  |           | -1.24 | -1.29 | 2.50e-03 |
| hsa-miR-1273a    |           | -1.12 | -1.23 | 2.30e-03 |

0 750 1500 2250 3000

**Supplementary Figure 11 | *In vitro* biomarkers of doxorubicin cardiomyopathy in isolated tissue chips. a**, Schematic detailing workflow characterizing miRNA expression between 1-tissue *Multi-organ* and *Mixed* tissue chips after doxorubicin treatment. **b-c**, Gene set enrichment analysis (GSEA) of miRNAs from isolated tissue *Multi-organ* (**b**) and *Mixed* (**c**) chips after doxorubicin treatment as benchmarked against clinically identified biomarkers of doxorubicin toxicity in a pediatric study (Oatmen et al., 2018). **d-e**, Gene set enrichment analysis (GSEA) of miRNAs from isolated 1-tissue *Multi-organ* (**d**) and *Mixed* (**e**) tissue chips after doxorubicin treatment as benchmarked against clinically identified biomarkers of doxorubicin toxicity in an adult study (Yadi et al., 2020). (\*Consistent with clinical finding; Color codes – Blue (Negative Fold-Change), Red (Positive Fold-Change))

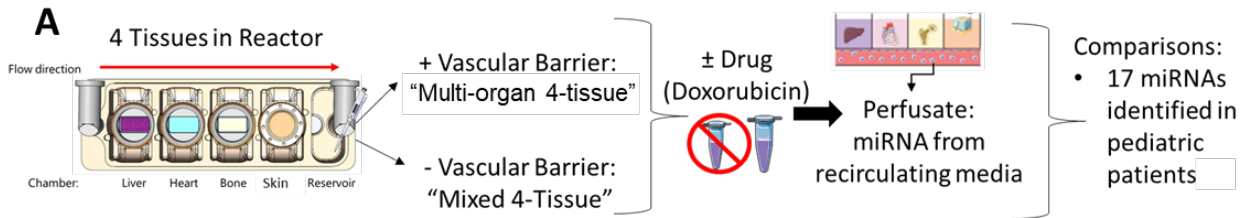

### miRNA Biomarkers of Doxorubicin Induced Cardiomyopathy – Pediatric Clinical Trial<sup>17</sup> Comparison

**B** Multi-organ 4-tissue Cardiac Tissue miRNA (Doxorubicin vs Control)

| miRNA           | GSEA plot | NES   | FC     | pval     |
|-----------------|-----------|-------|--------|----------|
| hsa-miR-143-3p  |           | 1.08  | 1.11   | 2.70e-03 |
| hsa-miR-199a-5p |           | -2.23 | -2.35* | 1.50e-04 |
| hsa-miR-107-5p  |           | -1.09 | -1.1*  | 2.70e-03 |
| hsa-miR-320a    |           | 1.42  | 1.53*  | 3.10e-03 |
| hsa-miR-103a-3p |           | 1.07  | 1.1    | 2.70e-03 |
| hsa-miR-145-5p  |           | -1.21 | -1.28* | 2.90e-03 |
| hsa-miR-181a-5p |           | 1.09  | 1.12   | 2.70e-03 |
| hsa-miR-100-5p  |           | -1.25 | -1.32* | 2.73e-03 |
| hsa-miR-499a-5p |           | -1.43 | -1.53  | 3.10e-03 |
| hsa-miR-146a-5p |           | -1.31 | -1.41* | 2.90e-03 |
| hsa-miR-210-3p  |           | -1.33 | -1.41  | 2.90e-03 |
| hsa-miR-92a-3p  |           | 1.34  | 1.42*  | 2.90e-03 |
| hsa-miR-342-3p  |           | 1.19  | 1.22   | 2.70e-03 |
| hsa-miR-142-3p  |           | -0.98 | -1*    | 2.60e-03 |
| hsa-miR-150-5p  |           | 1.08  | 1.1    | 2.70e-03 |
| hsa-miR-29c-3p  |           | -3.98 | -4.01  | 9.70e-06 |
| hsa-miR-486-5p  |           | 3.21  | 3.34*  | 8.10e-06 |

0 750 1500 2250 3000

**C** Mixed 4-tissue Cardiac Tissue miRNA (Doxorubicin vs Control)

| miRNA           | GSEA plot | NES   | FC     | pval     |
|-----------------|-----------|-------|--------|----------|
| hsa-miR-143-3p  |           | 511.1 | 521.12 | 9.10e-31 |
| hsa-miR-199a-5p |           | 291.1 | 310.12 | 8.10e-26 |
| hsa-miR-107-5p  |           | 3.25  | 3.32   | 9.70e-06 |
| hsa-miR-320a    |           | 3.45  | 3.52   | 9.80e-06 |
| hsa-miR-103a-3p |           | 3.82  | 3.91   | 9.90e-06 |
| hsa-miR-145-5p  |           | 561.2 | 581.21 | 8.10e-34 |
| hsa-miR-181a-5p |           | 18.23 | 18.43  | 4.50e-19 |
| hsa-miR-100-5p  |           | 723.1 | 750.21 | 5.60e-41 |
| hsa-miR-499a-5p |           | 0.99  | 1.01*  | 1.00e-03 |
| hsa-miR-146a-5p |           | 1.92  | 1.98   | 2.80e-04 |
| hsa-miR-210-3p  |           | 11.82 | 11.91  | 4.10e-15 |
| hsa-miR-92a-3p  |           | 1.98  | 2.01*  | 1.20e-04 |
| hsa-miR-342-3p  |           | 1.34  | 1.43   | 3.10e-03 |
| hsa-miR-142-3p  |           | -1.18 | -1.21* | 2.10e-03 |
| hsa-miR-150-5p  |           | 0.97  | 0.99   | 1.02e-02 |
| hsa-miR-29c-3p  |           | -1.12 | -1.15  | 1.10e-03 |
| hsa-miR-486-5p  |           | 1.01  | 1.04*  | 1.00e-03 |

0 750 1500 2250 3000

**Supplementary Figure 12 | *In vitro* biomarkers of doxorubicin cardiomyopathy in perfusate of multi-tissue chips.** **a**, Schematic detailing workflow characterizing miRNA expression between perfusate sampled from the recirculating media of the 4-Tissue *Multi-organ* and *Mixed* tissue chips after doxorubicin treatment. **b-c**, Gene set enrichment analysis (GSEA) of miRNAs from perfusate of the 4-Tissue *Multi-organ* (**b**) and 4-Tissue *Mixed* (**c**) tissue chips after doxorubicin treatment as benchmarked against clinically identified biomarkers of doxorubicin toxicity in a pediatric study (Oatmen et al., 2018). (\*Consistent with clinical finding; Color codes – Blue (Negative Fold-Change), Red (Positive Fold-Change))

| Tissue              | Tissue schematic                                                                    | ECM                          | Cell type                                                         | Seeding density per tissue                                                                                             | Total number of cells | Dimensions                                                                            | Total tissue volume |
|---------------------|-------------------------------------------------------------------------------------|------------------------------|-------------------------------------------------------------------|------------------------------------------------------------------------------------------------------------------------|-----------------------|---------------------------------------------------------------------------------------|---------------------|
| Liver               | 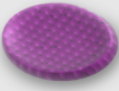   | Fibrin                       | hiPSC-derived hepatocytes and NHDF                                | $5 \times 10^5$ cells of each type                                                                                     | $1 \times 10^6$       | 9 mm x 2.1 mm (diameter x height)                                                     | $134 \text{ mm}^3$  |
| Heart               |    | Fibrin                       | hiPSC-derived cardiomyocytes and NHDF                             | $7.5 \times 10^5$ of cardiomyocytes and $2.5 \times 10^5$ of NHDF                                                      | $1 \times 10^6$       | 6.4 mm x 2.3 mm x 2 mm (length x width x height)                                      | $30 \text{ mm}^3$   |
| Bone                |    | Decellularized bone scaffold | MSC-derived osteoblasts and primary monocytes-derived osteoclasts | $4 \times 10^5$ cells of each cell                                                                                     | $8 \times 10^5$       | 8 mm x 4 mm x 1 mm (length x width x height)                                          | $32 \text{ mm}^3$   |
| Skin                |   | Collagen I                   | NHDF and keratinocytes                                            | $1.5 \times 10^5$ of NHDF and $2.5 \times 10^5$ of keratinocytes                                                       | $4 \times 10^5$       | 6.8 mm x 2.5 mm (diameter x height)                                                   | $91 \text{ mm}^3$   |
| Endothelial barrier |  | Fibronectin                  | HUVEC and MSC                                                     | $1.5 \times 10^5$ of MSC in the apical side, and $4 \times 10^5$ of HUVEC and $5 \times 10^4$ of MSC in the basal side | $6 \times 10^5$       |  |                     |
| Monocytes           |  | -                            | Primary CD14 <sup>+</sup> monocytes                               | $5 \times 10^4$ cells                                                                                                  | $5 \times 10^4$       | -                                                                                     | -                   |

**Supplementary Table 1 | Tissue specifications.** Extracellular matrix (ECM), cell types and numbers, dimensions, and volume for each tissue. hiPSC, human induced pluripotent stem cell; NHDF, normal human dermal fibroblasts; MSC, mesenchymal stem cell; HUVEC, human umbilical endothelial cell.

| <b><u>Circulating Endothelial Media:</u></b>      | <b><u>Cardiac Tissue Media:</u></b>                    | <b><u>Bone Tissue Media:</u></b>              |
|---------------------------------------------------|--------------------------------------------------------|-----------------------------------------------|
| Endothelial Basal Media (EBM)                     | RPMI                                                   | EMEM Basal Media                              |
| <b>EGM-2 Media Supplement:</b>                    | Penicillin/Streptomycin                                | FBS                                           |
| Fetal Bovine Serum (FBS)                          | <b>B27 Supplement:</b>                                 | Penicillin/Streptomycin                       |
| Hydrocortisone                                    | Biotin                                                 | M-CSF                                         |
| Human basic fibroblast growth factor (hFGF-B)     | DL alpha tocopherol acetate                            | sRANKL                                        |
| Vascular endothelial growth factor (VEGF)         | DL alpha-tocopherol                                    |                                               |
| Long Arg3 insulin-like growth factor-1 (R3-IGF-1) | Vitamin A (acetate)                                    |                                               |
| Ascorbic Acid                                     | Bovine serum albumin (BSA, fatty acid free fraction V) | <b><u>Skin Tissue Media:</u></b>              |
| Human epidermal growth factor (hEGF)              | Catalase                                               | <b>DMEM/F12</b>                               |
| Gentamicin sulfate-amphotericin (GA-1000)         | Human recombinant insulin                              | Adenine                                       |
| Heparin                                           | Human transferrin                                      | Hydrocortisone                                |
|                                                   | Superoxide dismutase                                   | T3 (triiodo-L-thyronine)                      |
|                                                   | Corticosterone                                         | Insulin-transferrin-selenium (ITS)            |
| <b><u>Liver Tissue Media:</u></b>                 | D-galactose                                            | Ascorbic acid                                 |
| <b>Hepatic Basal Media (HCM)</b>                  | Ethanolamine HCl                                       | Ethanolamine and phosphorylethanolamine (EOP) |
| <b>HCM Media Supplement:</b>                      | Glutathione (reduced)                                  | Calcium chloride                              |
| Transferrin                                       | L-carnitine HCl                                        | FBS                                           |
| Ascorbic acid                                     | Linoleic acid                                          | Penicillin/Streptomycin                       |
| Insulin                                           | Linolenic acid                                         |                                               |
| Hydrocortisone                                    | Progesterone                                           |                                               |
| BSA (fatty-acid free)                             | Putrescine 2HCl                                        |                                               |
| GA-1000                                           | Sodium selenite                                        |                                               |
|                                                   | T3 (triiodo-L-thyronine)                               |                                               |

**Supplementary Table 2 | Media compositions for each tissue type.** Each tissue compartment contained 1.5 mL of media (liver, heart, bone, or skin) and the vascular compartment contained 12 mL of endothelial media.

| Modeling parameters |                                                   |                          |
|---------------------|---------------------------------------------------|--------------------------|
| Parameter           | Value                                             | Reference                |
| $V_{\max}$          | 350 pmol (mg.min) <sup>-1</sup>                   | (Kassner et al., 2008)   |
| $K_m$               | 170 $\mu$ M                                       | (Kassner et al., 2008)   |
| $f_u$               | 1                                                 | (Sakolish et al., 2020)  |
| LogP                | 1.27                                              | (Wishart et al., 2008)   |
| $S_{L,el}$          | 43.5 L h <sup>-1</sup>                            | (Gustafson et al., 2002) |
| $Q_{cl}$            | $0.5 \times 10^{-10} \text{ m}^3 \text{ s}^{-1}$  | Calibrated               |
| $D_1$               | $2.12 \times 10^{-10} \text{ m}^2 \text{ s}^{-1}$ | (Biondi et al., 2013)    |
| $D_2$               | $1.58 \times 10^{-11} \text{ m}^2 \text{ s}^{-1}$ | (Qian et al., 2003)      |

**Supplementary Table 3 | Modeling parameters.**  $V_{\max}$ , maximum reaction rate;  $K_m$ , Michaelis constant;  $F_u$ , unbound fraction of the drug LogP, lipophilicity;  $S_{L,el}$ , compound elimination rate;  $Q_{cl}$ , clearance flow rate;  $D_1$ , diffusivity of the drug in the compartments containing media;  $D_2$ , diffusivity of the drug in the solid compartments.



| <b>Extended Data Fig. 9A</b> |                                                                                                                   |
|------------------------------|-------------------------------------------------------------------------------------------------------------------|
| <b>Variable</b>              | <b>Meaning</b>                                                                                                    |
| S                            | Skin                                                                                                              |
| ST                           | Skin tank                                                                                                         |
| B                            | Bone                                                                                                              |
| BT                           | Bone tank                                                                                                         |
| H                            | Heart                                                                                                             |
| HT                           | Heart tank                                                                                                        |
| L                            | Liver                                                                                                             |
| LT                           | Liver tank                                                                                                        |
| $Q_f$                        | Flow rate                                                                                                         |
| LIFC                         | Liver inlet fluidic channel                                                                                       |
| LFC                          | Liver fluidic channel                                                                                             |
| HIFC                         | Heart inlet fluidic channel                                                                                       |
| HFC                          | Heart fluidic channel                                                                                             |
| BIFC                         | Bone inlet fluidic channel                                                                                        |
| BFC                          | Bone fluidic channel                                                                                              |
| SIFC                         | Skin inlet fluidic channel                                                                                        |
| SFC                          | Skin fluidic channel                                                                                              |
| SOFC                         | Skin outlet fluidic channel                                                                                       |
| SMM                          | Endothelial membrane below the skin tank                                                                          |
| BMM                          | Endothelial membrane below the bone tank                                                                          |
| HMM                          | Endothelial membrane below the heart tank                                                                         |
| LMM                          | Endothelial membrane below the liver tank                                                                         |
| <b>Extended Data Fig. 9B</b> |                                                                                                                   |
| <b>Variable</b>              | <b>Meaning</b>                                                                                                    |
| J                            | Flux between two different compartments or tissue                                                                 |
| V                            | Volume of compartment or tissue                                                                                   |
| C                            | Concentration of a compound in a compartment or tissue                                                            |
| LTT                          | Top layer of the liver tank                                                                                       |
| LMT                          | Middle layer of the liver tank                                                                                    |
| LBT                          | Bottom layer of the liver tank                                                                                    |
| LTM                          | Top layer of the endothelial barrier below the liver tank                                                         |
| LMM                          | Middle layer of the endothelial barrier below the liver tank                                                      |
| LBM                          | Bottom layer of the endothelial barrier below the liver tank                                                      |
| LFC                          | Liver fluidic channel                                                                                             |
| LIFC                         | Liver inlet fluidic channel                                                                                       |
| TB20                         | Section 20 of the tubing lumen                                                                                    |
| L                            | Liver tissue                                                                                                      |
| $Q_f$                        | Flow rate                                                                                                         |
| $J_{LMT-LTT}$                | Flux between the middle and the top layers of the liver tank                                                      |
| $J_{LBT-LMT}$                | Flux between the bottom and the middle layers of the liver tank                                                   |
| $J_{LTM-LBT}$                | Flux between the top layer of the endothelial barrier below the liver tank and the bottom layer of the liver tank |
| $J_{LBT-L}$                  | Flux between the bottom layer of the liver tank and the liver tissue                                              |
| $J_{LMM-LTM}$                | Flux between the middle and the top layers of the endothelial barrier below the liver tank                        |
| $J_{LBM-LMM}$                | Flux between the bottom and the middle layers of the endothelial barrier below the liver tank                     |
| $J_{LFC-LBM}$                | Flux between the liver fluidic channel and the bottom layer of the endothelial barrier below the liver tank       |

| V <sub>LTT</sub>      | Volume of the top layer of the liver tank                                                                         |
|-----------------------|-------------------------------------------------------------------------------------------------------------------|
| C <sub>LTT</sub>      | Concentration of the top layer of the liver tank                                                                  |
| V <sub>LMT</sub>      | Volume of the middle layer of the liver tank                                                                      |
| C <sub>LMT</sub>      | Concentration in the middle layer of the liver tank                                                               |
| V <sub>LBT</sub>      | Volume of the bottom layer of the liver tank                                                                      |
| C <sub>LBT</sub>      | Concentration in bottom layer of the liver tank                                                                   |
| V <sub>L</sub>        | Volume of liver tissue                                                                                            |
| C <sub>L</sub>        | Concentration in the liver tissue                                                                                 |
| V <sub>LTM</sub>      | Volume of the top layer of the endothelial barrier below the liver tank                                           |
| C <sub>LTM</sub>      | Concentration in the top layer of the endothelial barrier below the liver tank                                    |
| V <sub>LMM</sub>      | Volume of middle layer of the endothelial barrier below the liver tank                                            |
| C <sub>LMM</sub>      | Concentration in the middle layer of the endothelial barrier below the liver tank                                 |
| V <sub>LBM</sub>      | Volume of bottom layer of the endothelial barrier below the liver tank                                            |
| C <sub>LBM</sub>      | Concentration in the bottom layer of the endothelial barrier below the liver tank                                 |
| V <sub>LFC</sub>      | Volume of the liver fluidic channel                                                                               |
| C <sub>LFC</sub>      | Concentration in the liver fluidic channel                                                                        |
| V <sub>LIFC</sub>     | Volume of the liver inlet fluidic channel                                                                         |
| C <sub>LIFC</sub>     | Concentration in the liver inlet fluidic channel                                                                  |
| C <sub>TB20</sub>     | Concentration in section 20 of the tubing lumen                                                                   |
| Extended Data Fig. 9C |                                                                                                                   |
| Variable              | Meaning                                                                                                           |
| J                     | Flux between two different compartments or tissue                                                                 |
| V                     | Volume of compartment or tissue                                                                                   |
| C                     | Concentration of a compound in a compartment or tissue                                                            |
| HTT                   | Top layer of the heart tank                                                                                       |
| HMT                   | Middle layer of the heart tank                                                                                    |
| HBT                   | Bottom layer of the heart tank                                                                                    |
| HTM                   | Top layer of the endothelial barrier below the heart tank                                                         |
| HMM                   | Middle layer of the endothelial barrier below the heart tank                                                      |
| HBM                   | Bottom layer of the endothelial barrier below the heart tank                                                      |
| HFC                   | Heart fluidic channel                                                                                             |
| HIFC                  | Heart inlet fluidic channel                                                                                       |
| LFC                   | Liver fluidic channel                                                                                             |
| H                     | Heart tissue                                                                                                      |
| Q <sub>f</sub>        | Flow rate                                                                                                         |
| J <sub>HTT-PD</sub>   | Flux between the top layer of the heart tank and the PDMS pillars                                                 |
| J <sub>HMT-HTT</sub>  | Flux between the middle and the top layers of the heart tank                                                      |
| J <sub>HMT-PD</sub>   | Flux between the middle layer of the heart tank and the PDMS pillars                                              |
| J <sub>HBT-HMT</sub>  | Flux between the bottom and the middle layers of the heart tank                                                   |
| J <sub>HMT-H</sub>    | Flux between the middle layer of the heart tank and the heart tissue                                              |
| J <sub>HTM-HBT</sub>  | Flux between the top layer of the endothelial barrier below the heart tank and the bottom layer of the heart tank |
| J <sub>HMM-HTM</sub>  | Flux between the middle and the top layers of the endothelial barrier below the heart tank                        |
| J <sub>HBM-HMM</sub>  | Flux between the bottom and the middle layers of the endothelial barrier below the hear tank                      |
| J <sub>HFC-HBM</sub>  | Flux between the heart fluidic channel and the bottom layer of the endothelial barrier below the heart tank       |
| V <sub>HTT</sub>      | Volume of the top layer of the heart tank                                                                         |
| C <sub>HTT</sub>      | Concentration in the top layer of the heart tank                                                                  |
| V <sub>HMT</sub>      | Volume of the middle layer of the heart tank                                                                      |
| C <sub>HMT</sub>      | Concentration in the middle layer of the heart tank                                                               |
| V <sub>HBT</sub>      | Volume of the bottom layer of the heart tank                                                                      |
| C <sub>HBT</sub>      | Concentration in the bottom layer of the heart tank                                                               |
| V <sub>H</sub>        | Volume of the heart tissue                                                                                        |

| $C_H$                        | Concentration in the heart tissue                                                                         |
|------------------------------|-----------------------------------------------------------------------------------------------------------|
| $V_{HTM}$                    | Volume of the top layer of the endothelial barrier below the heart tank                                   |
| $C_{HTM}$                    | Concentration in the top layer of the endothelial barrier below the heart tank                            |
| $V_{HMM}$                    | Volume of the middle layer of the endothelial barrier below the heart tank                                |
| $C_{HMM}$                    | Concentration in the middle layer of the endothelial barrier below the heart tank                         |
| $V_{HBM}$                    | Volume of the bottom layer of the endothelial barrier below the heart tank                                |
| $C_{HBM}$                    | Concentration in the bottom layer of the endothelial barrier below the heart tank                         |
| $V_{HFC}$                    | Volume of the heart fluidic channel                                                                       |
| $C_{HFC}$                    | Concentration in the heart fluidic channel                                                                |
| $V_{HIFC}$                   | Volume of the heart inlet fluidic channel                                                                 |
| $C_{HIFC}$                   | Concentration in the heart inlet fluidic channel                                                          |
| $C_{LFC}$                    | Concentration in the liver fluidic channel                                                                |
| <b>Extended Data Fig. 9D</b> |                                                                                                           |
| <b>Variable</b>              | <b>Meaning</b>                                                                                            |
| J                            | Flux between two different compartments or tissue                                                         |
| V                            | Volume of compartment or tissue                                                                           |
| C                            | Concentration of a compound in a compartment or tissue                                                    |
| B                            | Bone tissue                                                                                               |
| BTT                          | Top layer of the bone tank                                                                                |
| BMT                          | Middle layer of the bone tank                                                                             |
| BBT                          | Bottom layer of the bone tank                                                                             |
| BTM                          | Top layer of the endothelial barrier below the bone tank                                                  |
| BMM                          | Middle layer of the endothelial barrier below the bone tank                                               |
| BBM                          | Bottom layer of the endothelial barrier below the bone tank                                               |
| BFC                          | Bone fluidic channel                                                                                      |
| BIFC                         | Bone inlet fluidic channel                                                                                |
| HFC                          | Heart fluidic channel                                                                                     |
| $Q_f$                        | Flow rate                                                                                                 |
| $J_{BMT-BTT}$                | Flux between the middle and the top layers of the bone tank                                               |
| $J_{BBT-BMT}$                | Flux between the bottom and the middle layers of the bone tank                                            |
| $J_{BBT-B}$                  | Flux between the bottom layer of the bone tank and the bone tissue                                        |
| $J_{BTM-B}$                  | Flux between the top layer of the endothelial barrier below the bone tank and the bone tissue             |
| $J_{BMM-BTM}$                | Flux between the middle and the top layers of the endothelial barrier below the bone tank                 |
| $J_{BBM-BMM}$                | Flux between the bottom and the middle layers of the endothelial barrier below the bone tank              |
| $J_{BFC-BBM}$                | Flux between the bone fluidic channel and the bottom layer of the endothelial barrier below the bone tank |
| $V_{BTT}$                    | Volume of the top layer of the bone tank                                                                  |
| $C_{BTT}$                    | Concentration in the top layer of the bone tank                                                           |
| $V_{BMT}$                    | Volume of the middle layer of the bone tank                                                               |
| $C_{BMT}$                    | Concentration in the middle layer of the bone tank                                                        |
| $V_{BBT}$                    | Volume of the bottom layer of the bone tank                                                               |
| $C_{BBT}$                    | Concentration in the bottom layer of the bone tank                                                        |
| $V_B$                        | Volume of the bone tissue                                                                                 |
| $C_B$                        | Concentration in the bone tissue                                                                          |
| $V_{BTM}$                    | Volume of the top layer of the endothelial barrier below the bone tank                                    |
| $C_{BTM}$                    | Concentration in the top layer of the endothelial barrier below the bone tank                             |
| $V_{BMM}$                    | Volume of middle layer of the endothelial barrier below the bone tank                                     |
| $C_{BMM}$                    | Concentration in the middle layer of the endothelial barrier below the bone tank                          |
| $V_{BBM}$                    | Volume of bottom layer of the endothelial barrier below the bone tank                                     |
| $C_{BBM}$                    | Concentration in the bottom layer of the endothelial barrier below the bone tank                          |
| $V_{BFC}$                    | Volume of the bone fluidic channel                                                                        |
| $C_{BFC}$                    | Concentration in the bone fluidic channel                                                                 |

| $V_{BIFC}$                   | Volume of the bone inlet fluidic channel                                                                        |
|------------------------------|-----------------------------------------------------------------------------------------------------------------|
| $C_{BIFC}$                   | Concentration in the bone inlet fluidic channel                                                                 |
| $C_{HFC}$                    | Concentration in heart fluidic channel                                                                          |
| <b>Extended Data Fig. 9E</b> |                                                                                                                 |
| <b>Variable</b>              | <b>Meaning</b>                                                                                                  |
| J                            | Flux between two different compartments or tissue                                                               |
| V                            | Volume of compartment or tissue                                                                                 |
| C                            | Concentration of a compound in a compartment or tissue                                                          |
| S                            | Skin tissue                                                                                                     |
| STT                          | Top layer of the skin tank                                                                                      |
| SMT                          | Middle layer of the skin tank                                                                                   |
| SBT                          | Bottom layer of the skin tank                                                                                   |
| STM                          | Top layer of the endothelial barrier below the skin tank                                                        |
| SMM                          | Middle layer of the endothelial barrier below the skin tank                                                     |
| SBM                          | Bottom layer of the endothelial barrier below the skin tank                                                     |
| SOFC                         | Skin outlet fluidic channel                                                                                     |
| SFC                          | Skin fluidic channel                                                                                            |
| SIFC                         | Skin inlet fluidic channel                                                                                      |
| BFC                          | Bone fluidic channel                                                                                            |
| $Q_f$                        | Flow rate                                                                                                       |
| $J_{STT-S}$                  | Flux between the top layer of the skin tank and the skin tissue                                                 |
| $J_{SMT-STT}$                | Flux between the middle and the top layers of the skin tank                                                     |
| $J_{SBT-SMT}$                | Flux between the bottom and the middle layers of the skin tank                                                  |
| $J_{STM-SBT}$                | Flux between the top layer of the endothelial barrier below the skin tank and the bottom layer of the skin tank |
| $J_{SMM-STM}$                | Flux between the middle and the top layers of the endothelial barrier below the skin tank                       |
| $J_{SBM-SMM}$                | Flux between the bottom and the middle layers of the endothelial barrier below the skin tank                    |
| $J_{SFC-SBM}$                | Flux between the skin fluidic channel and the bottom layer of the endothelial barrier below the skin tank       |
| $V_{STT}$                    | Volume of the top layer of the skin tank                                                                        |
| $C_{STT}$                    | Concentration in the top layer of the skin tank                                                                 |
| $V_{SMT}$                    | Volume of the middle layer of the skin tank                                                                     |
| $C_{SMT}$                    | Concentration in the middle layer of the skin tank                                                              |
| $V_{SBT}$                    | Volume of the bottom layer of the skin tank                                                                     |
| $C_{SBT}$                    | Concentration in the bottom layer of the skin tank                                                              |
| $V_S$                        | Volume of the skin tissue                                                                                       |
| $C_S$                        | Concentration in the skin tissue                                                                                |
| $V_{STM}$                    | Volume of the top layer of the endothelial barrier below the skin tank                                          |
| $C_{STM}$                    | Concentration in the top layer of the endothelial barrier below the skin tank                                   |
| $V_{SMM}$                    | Volume of middle layer of the endothelial barrier below the skin tank                                           |
| $C_{SMM}$                    | Concentration in the middle layer of the endothelial barrier below the skin tank                                |
| $V_{SBM}$                    | Volume of bottom layer of the endothelial barrier below the skin tank                                           |
| $C_{SBM}$                    | Concentration in the bottom layer of the endothelial barrier below the skin tank                                |
| $V_{SOFC}$                   | Volume of the skin outlet fluidic channel                                                                       |
| $C_{SOFC}$                   | Concentration in the skin outlet fluidic channel                                                                |
| $V_{SFC}$                    | Volume of the skin fluidic channel                                                                              |
| $C_{SFC}$                    | Concentration in the skin fluidic channel                                                                       |
| $V_{SIFC}$                   | Volume of the skin inlet fluidic channel                                                                        |
| $C_{SIFC}$                   | Concentration in the skin inlet fluidic channel                                                                 |
| $C_{BFC}$                    | Concentration in the bone fluidic channel                                                                       |
| <b>Extended Data Fig. 9F</b> |                                                                                                                 |
| <b>Variable</b>              | <b>Meaning</b>                                                                                                  |
| J                            | Flux between two different compartments or tissue                                                               |

|                          |                                                        |
|--------------------------|--------------------------------------------------------|
| V                        | Volume of compartment or tissue                        |
| C                        | Concentration of a compound in a compartment or tissue |
| RES                      | Reservoir                                              |
| i                        | Section i of the tubing wall or lumen (i = 2 - 19)     |
| TB,1                     | Section 1 of the tubing wall                           |
| TB,2                     | Section 2 of the tubing wall                           |
| TB,i-1                   | Section i-1 of the tubing wall                         |
| TB,i                     | Section i of the tubing wall                           |
| TB,i+1                   | Section i+1 of the tubing wall                         |
| TB,19                    | Section 19 of the tubing wall                          |
| TB,20                    | Section 20 of the tubing wall                          |
| TL,1                     | Section 1 of the tubing lumen                          |
| TL,2                     | Section 2 of the tubing lumen                          |
| TL,i-1                   | Section i-1 of the tubing lumen                        |
| TL,i                     | Section i of the tubing lumen                          |
| TL,i+1                   | Section i+1 of the tubing lumen                        |
| TL,19                    | Section 19 of the tubing lumen                         |
| TL,20                    | Section 20 of the tubing lumen                         |
| SOFC                     | Skin outlet fluidic channel                            |
| Q <sub>f</sub>           | Flow rate                                              |
| J <sub>TL,1-TB,1</sub>   | Flux between sections 1 of the tubing lumen and wall   |
| J <sub>TB,1-TB,2</sub>   | Flux between sections 1 and 2 of the tubing wall       |
| J <sub>TL,1-TL,2</sub>   | Flux between sections 1 and 2 of the tubing lumen      |
| J <sub>TB,i-1-TB,i</sub> | Flux between sections i-1 and i of the tubing wall     |
| J <sub>TL,i-1-TL,i</sub> | Flux between sections i-1 and i of the tubing lumen    |
| J <sub>TL,i-TB,i</sub>   | Flux between sections i of the tubing lumen and wall   |
| J <sub>TB,i-TB,i+1</sub> | Flux between sections i and i+1 of the tubing wall     |
| J <sub>TL,i-TL,i+1</sub> | Flux between sections i and i+1 of the tubing lumen    |
| J <sub>TB,19-TB,20</sub> | Flux between sections 19 and 20 of the tubing wall     |
| J <sub>TL,19-TL,20</sub> | Flux between sections 19 and 20 of the tubing lumen    |
| J <sub>TL,20-TB,20</sub> | Flux between sections 20 of the tubing lumen and wall  |
| C <sub>SOFC</sub>        | Concentration in the skin outlet fluidic channel       |
| V <sub>RES</sub>         | Volume in the reservoir                                |
| C <sub>RES</sub>         | Concentration in the reservoir                         |
| V <sub>TB,1</sub>        | Volume in section 1 of the tubing wall                 |
| C <sub>TB,1</sub>        | Concentration in section 1 of the tubing wall          |
| V <sub>TL,1</sub>        | Volume in section 1 of the tubing lumen                |
| C <sub>TL,1</sub>        | Concentration in section 1 of the tubing lumen         |
| V <sub>TB,i</sub>        | Volume in section i of the tubing wall                 |
| C <sub>TB,i</sub>        | Concentration in section i of the tubing wall          |
| V <sub>TL,i</sub>        | Volume in the section i of the tubing lumen            |
| C <sub>TL,i</sub>        | Concentration in section i of the tubing lumen         |
| V <sub>TB,20</sub>       | Volume in the section 20 of the tubing wall            |
| C <sub>TB,20</sub>       | Concentration in section 20 of the tubing wall         |
| V <sub>TL,20</sub>       | Volume in the section 20 of the tubing lumen           |
| C <sub>TL,20</sub>       | Concentration in section 20 of the tubing lumen        |

**Supplementary Fig. 6**

| Variable | Meaning                                                |
|----------|--------------------------------------------------------|
| J        | Flux between two different compartments or tissue      |
| V        | Volume of compartment or tissue                        |
| C        | Concentration of a compound in a compartment or tissue |
| BT       | Bottom layer of the tank                               |
| MM       | Membrane below the tank                                |

|               |                                                                                     |
|---------------|-------------------------------------------------------------------------------------|
| FC            | Fluidic channel below the membrane                                                  |
| B             | Bone tissue                                                                         |
| BMM           | Membrane below the bone tank                                                        |
| BFC           | Bone fluidic channel                                                                |
| $Q_f$         | Flow rate                                                                           |
| $J_{MM-BT}$   | Flux between the membrane below the tank and the bottom layer of the tank           |
| $J_{FC-MM}$   | Flux between the fluidic channel below the membrane and the membrane below the tank |
| $J_{BMM-B}$   | Flux between the membrane below the bone tank                                       |
| $J_{BFC-BMM}$ | Flux between the bone fluidic channel and the membrane below the bone tank          |
| $V_{BT}$      | Volume of the bottom layer of the tank                                              |
| $C_{BT}$      | Concentration in the bottom layer of the tank                                       |
| $V_{MM}$      | Volume of the membrane below the tank                                               |
| $C_{MM}$      | Concentration in the membrane below the tank                                        |
| $V_{FC}$      | Volume of the fluidic channel below the membrane                                    |
| $C_{FC}$      | Concentration in the fluidic channel below the membrane                             |
| $V_B$         | Volume of the bone tissue                                                           |
| $C_B$         | Concentration in bone tissue                                                        |
| $V_{BMM}$     | Volume of the membrane below the bone tank                                          |
| $C_{BMM}$     | Concentration in membrane below the bone tank                                       |
| $V_{BFC}$     | Volume of the bone fluidic channel                                                  |
| $C_{BFC}$     | Concentration in the bone fluidic channel                                           |

**Supplementary Table 4 | Terms used in the computational model and their meaning.**

## Supplementary Video 1 | Assembly of the tissue chip.

### Supplementary References

- Biondi, M., Fusco, S., Lewis, A. L., & Netti, P. A. (2013). Investigation of the mechanisms governing doxorubicin and irinotecan release from drug-eluting beads: Mathematical modeling and experimental verification. *Journal of Materials Science: Materials in Medicine*, 24(10), 2359–2370. <https://doi.org/10.1007/s10856-013-4992-4>
- Gustafson, D. L., Rastatter, J. C., Colombo, T., & Long, M. E. (2002). Doxorubicin pharmacokinetics: Macromolecule binding, metabolism, and excretion in the context of a physiologic model. *Journal of Pharmaceutical Sciences*, 91(6), 1488–1501. <https://doi.org/10.1002/jps.10161>
- Kassner, N., Huse, K., Martin, H.-J., Gödtel-Armbrust, U., Metzger, A., Meineke, I., Brockmüller, J., Klein, K., Zanger, U. M., Maser, E., & Wojnowski, L. (2008). Carbonyl reductase 1 is a predominant doxorubicin reductase in the human liver. *Drug Metabolism and Disposition*, 36(10), 2113–2120. <https://doi.org/10.1124/dmd.108.022251>
- Oatmen, K.E., Toro-Salazar, O.H., Hauser, K., Zellars, K.N., Mason, K.C., Hor, K., Gillan, E., Zeiss, C.J., Gatti, D.M., & Spinale, F.G. (2018). Identification of a novel microRNA profile in pediatric patients with cancer treated with anthracycline chemotherapy. *American Journal of Physiology. Heart and Circulatory Physiology*, 315(5), H1443-H1452. doi: 10.1152/ajpheart.00252.2018.
- Qian, F., Stowe, N., Liu, E. H., Saidel, G. M., & Gao, J. (2003). Quantification of in vivo doxorubicin transport from PLGA millirods in thermoablated rat livers. *Journal of Controlled Release*, 91(1–2), 157–166. [https://doi.org/10.1016/s0168-3659\(03\)00237-2](https://doi.org/10.1016/s0168-3659(03)00237-2)
- Sakolish, C., House, J. S., Chramiec, A., Liu, Y., Chen, Z., Halligan, S. P., Vunjak-Novakovic, G., & Rusyn, I. (2020). Tissue-engineered bone tumor as a reproducible human in vitro model for studies of anticancer drugs. *Toxicological Sciences*, 173(1), 65–76. <https://doi.org/10.1093/toxsci/kfz220>
- Wishart, D. S., Knox, C., Guo, A. C., Cheng, D., Shrivastava, S., Tzur, D., Gautam, B., & Hassanali, M. (2008). DrugBank: A knowledgebase for drugs, drug actions and drug targets. *Nucleic Acids Research*, 36(Database issue), D901-906. <https://doi.org/10.1093/nar/gkm958>
- Yadi, W., Shurui, C., Tong, Z., Suxian, C., Qing, T., & Dongning, H. (2020). Bioinformatic analysis of peripheral blood miRNA of breast cancer patients in relation with anthracycline cardiotoxicity. *BMC Cardiovascular Disorders*, 20(1), 43. doi: 10.1186/s12872-020-01346-y.
